# Supplementary material
Source: Springer Nature journal article supplement (https://www.springermedizin.de/resource/supplementary/13002_2006_26_MOESM3_ESM.pdf/9627004)

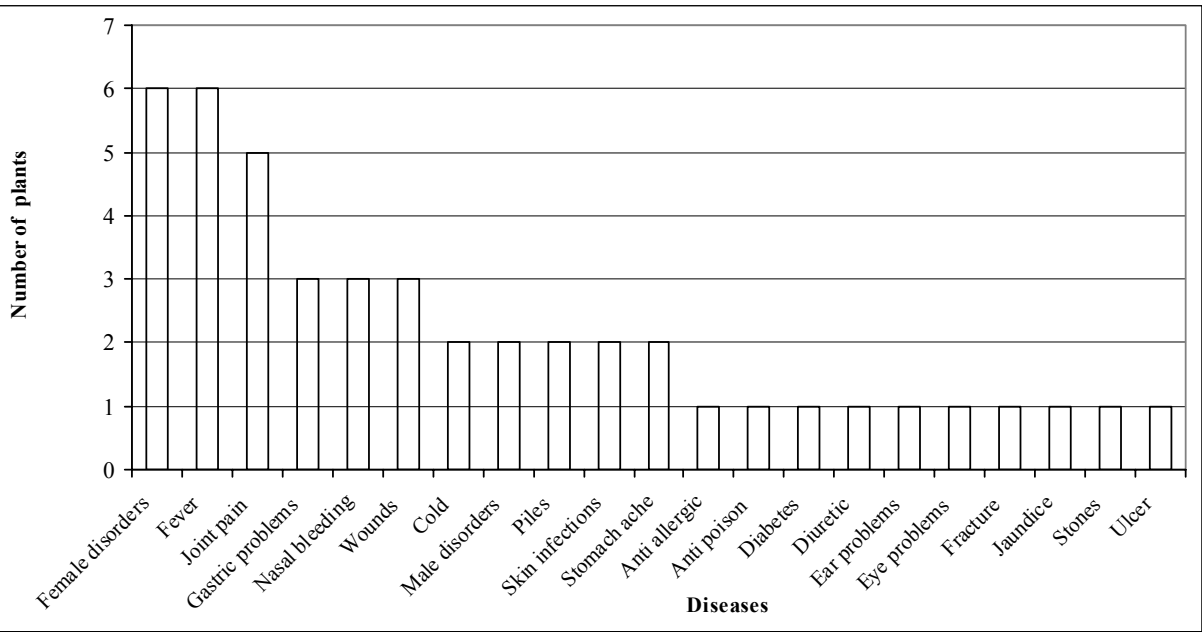

Supplement: MOESM3 [file 9627004]
